# Supplementary material for: The complete diploid reference genome of RPE-1 identifies human phased epigenetic landscapes
Source: PubMed Central journal article supplement — bioRxiv. 2023 Dec 30:2023.11.01.565049. Preprint. [Version 2] doi: 10.1101/2023.11.01.565049 (PMC10760208; doi:10.1101/2023.11.01.565049), 2023-12-30

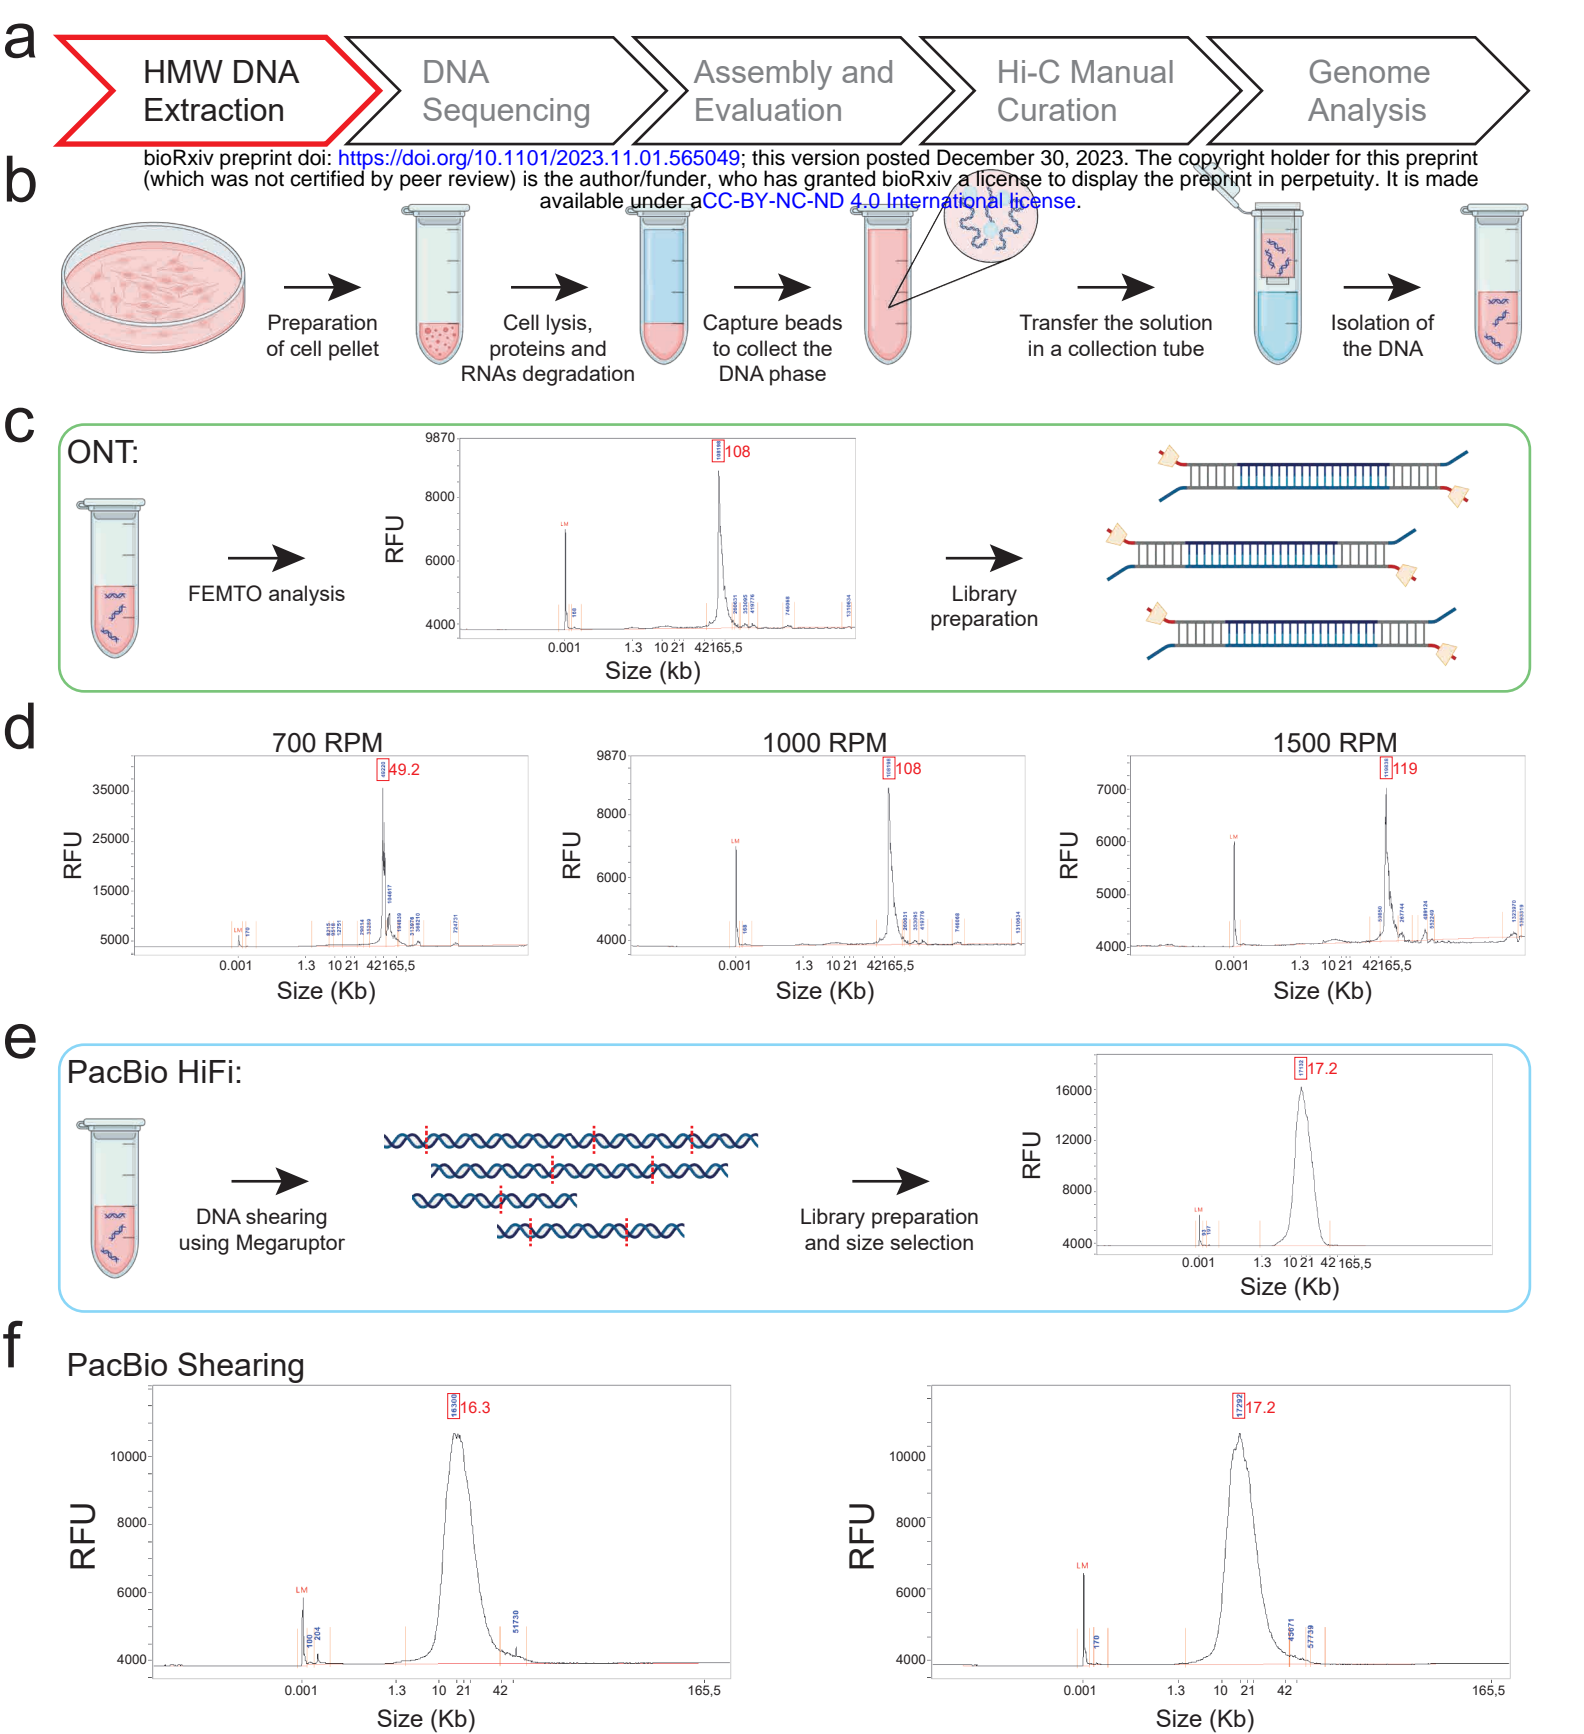

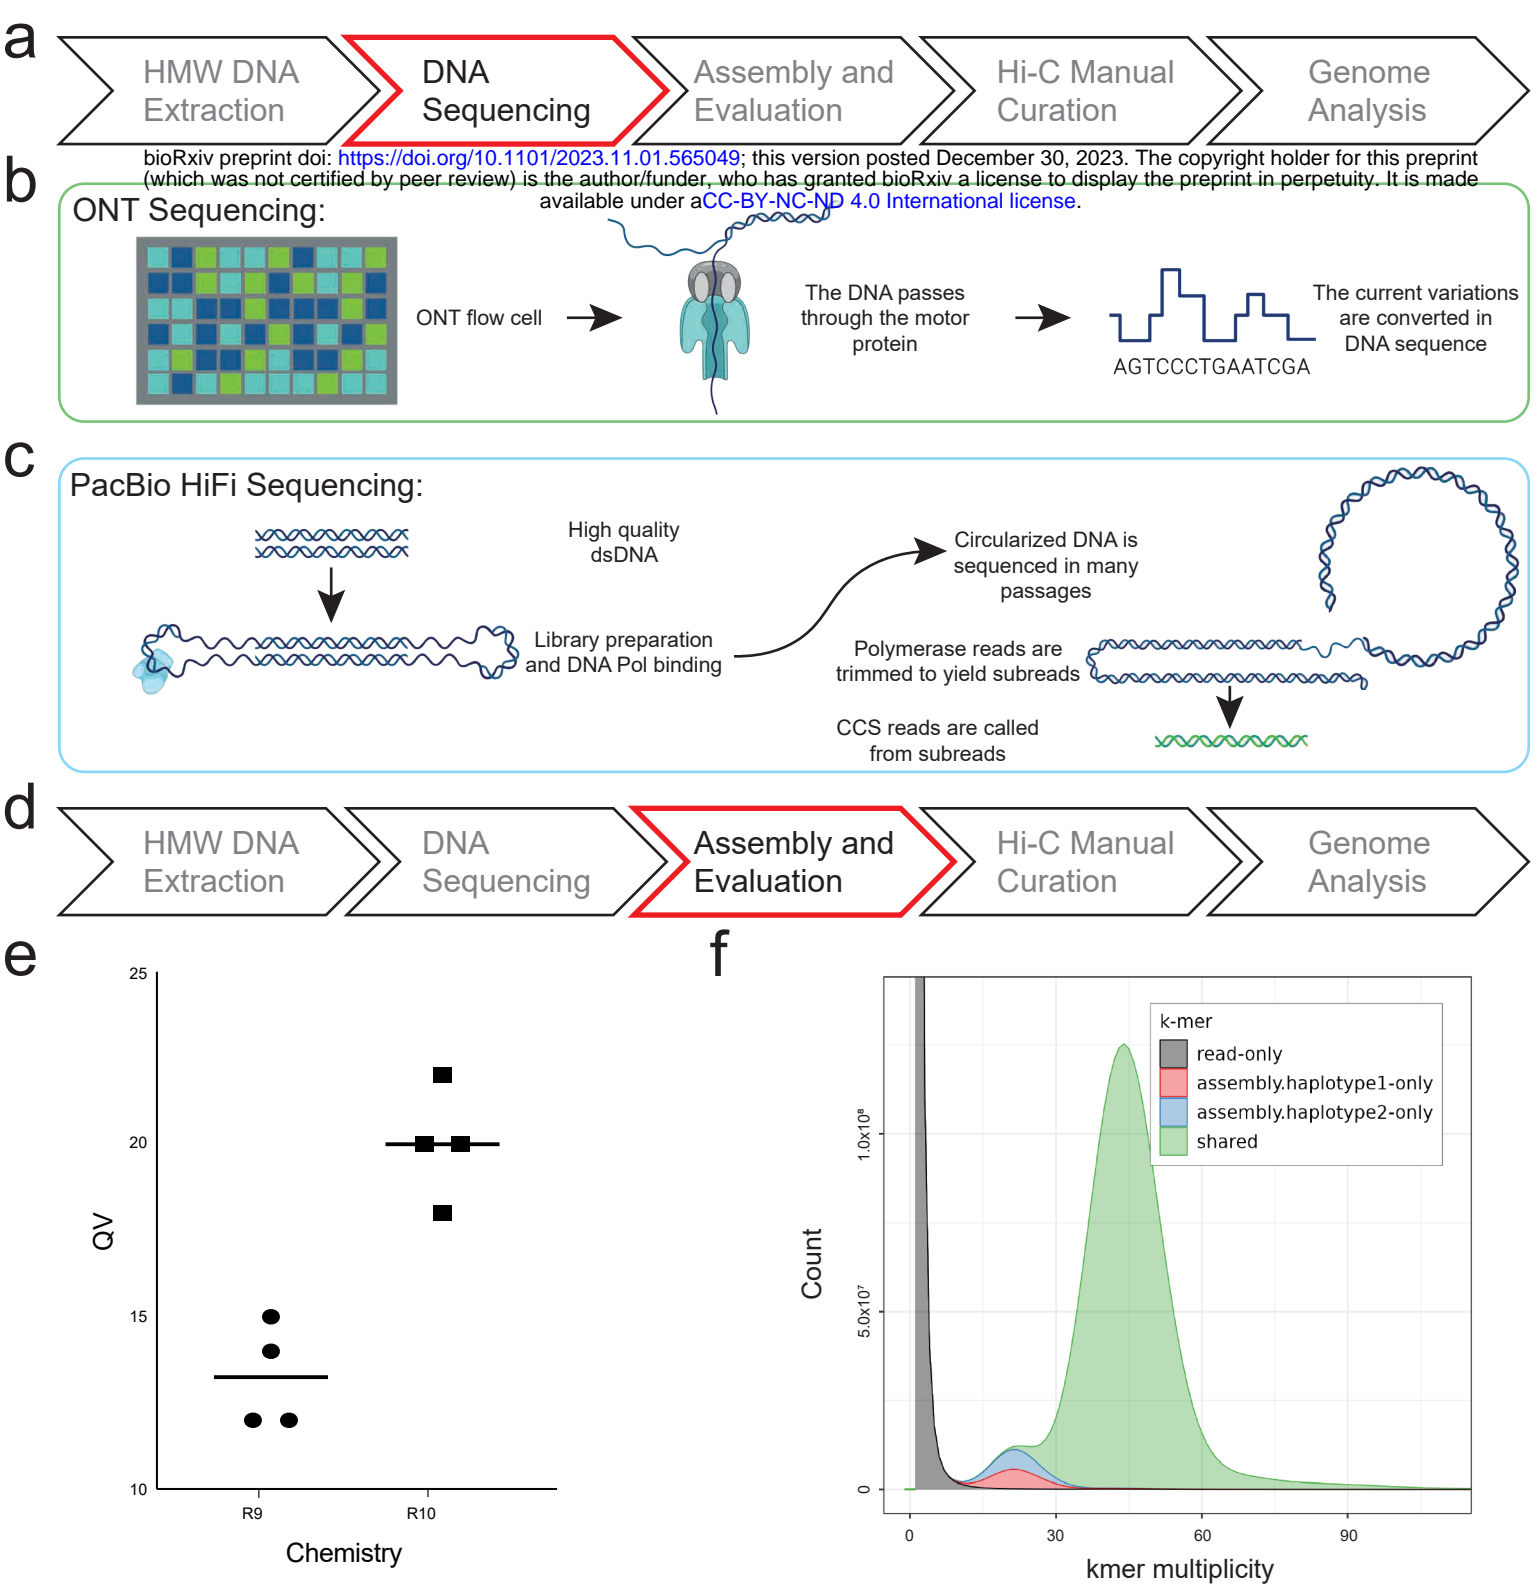

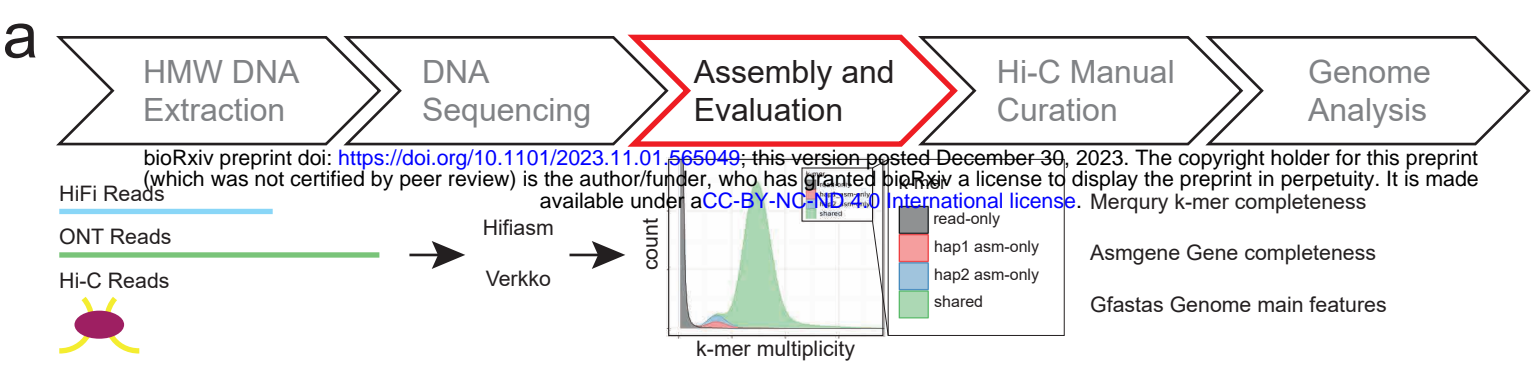

**b** Verkko assembly with HiFi and UL-ONT (over 100 kbp)

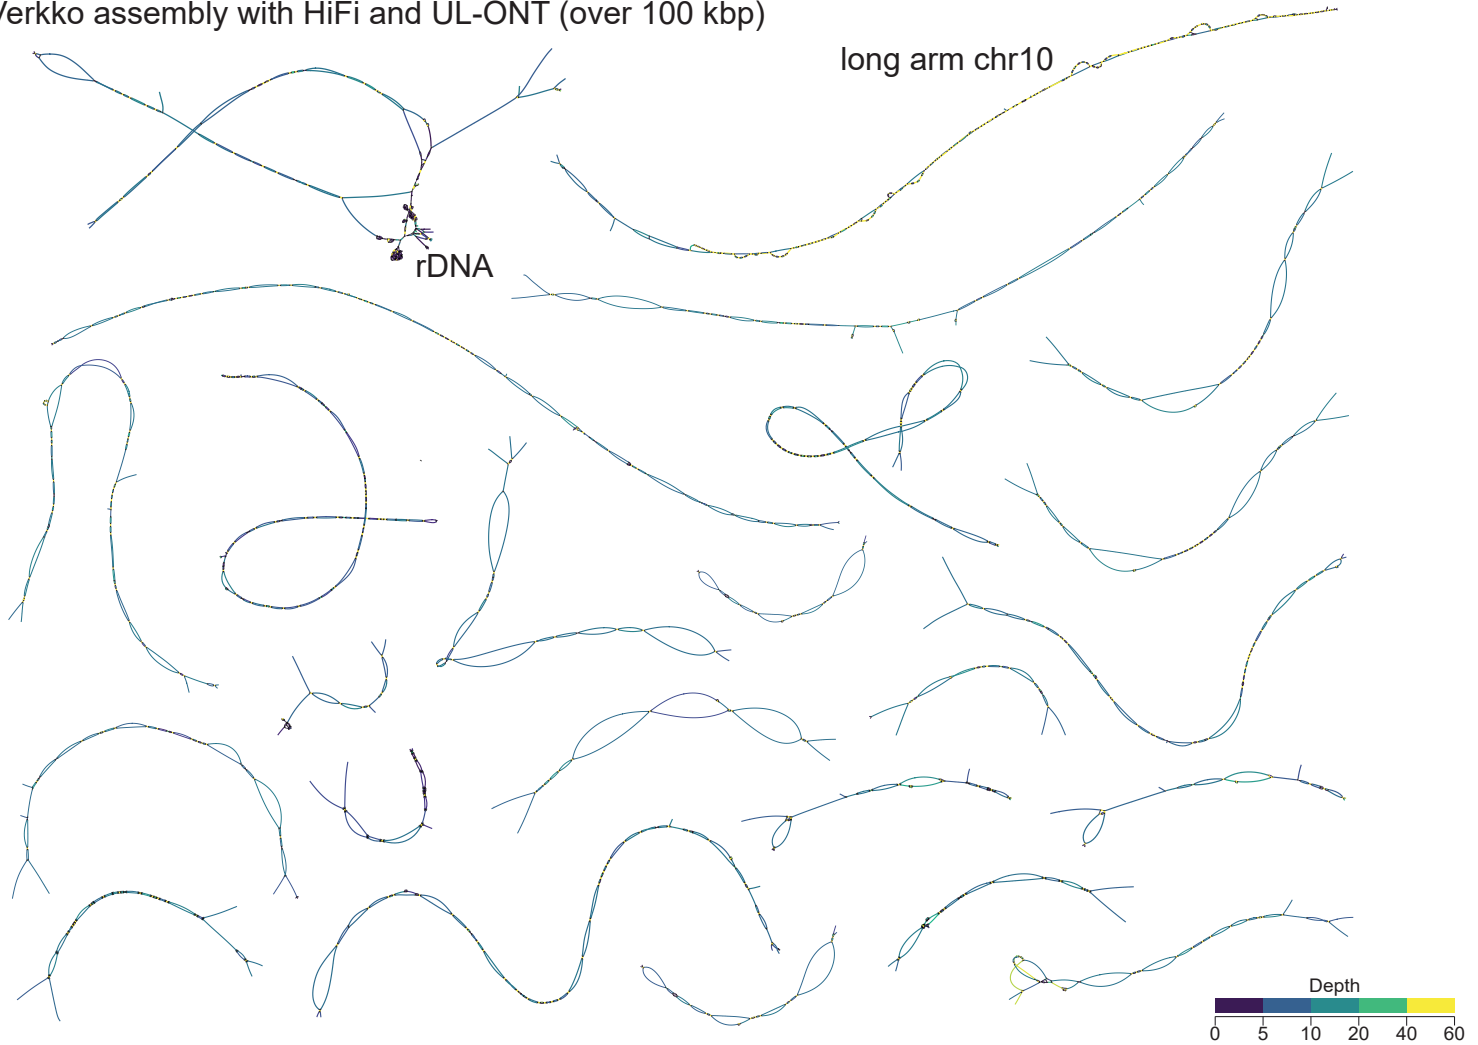

**c** Hifiasm partially-phased assembly

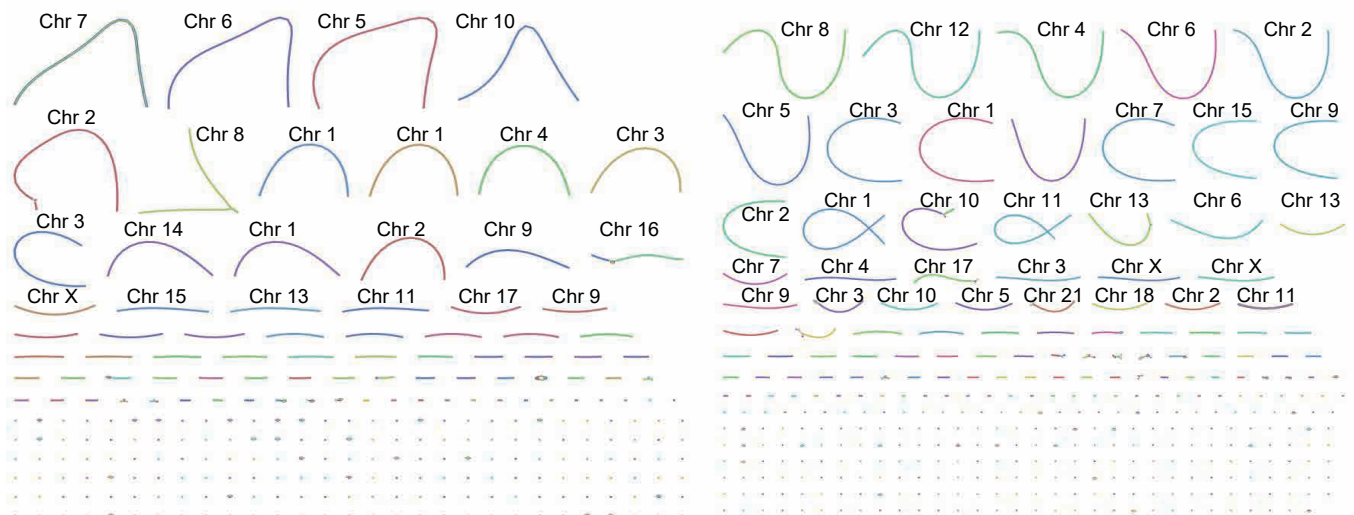

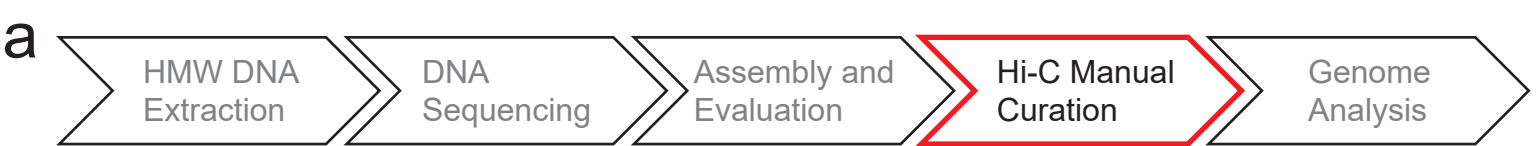

bioRxiv preprint doi: <https://doi.org/10.1101/2023.11.01.565049>; this version posted December 30, 2023. The copyright holder for this preprint (which was not certified by peer review) is the author/funder, who has granted bioRxiv a license to display the preprint in perpetuity. It is made available under a [CC-BY-NC-ND 4.0 International license](https://creativecommons.org/licenses/by-nc-nd/4.0/).

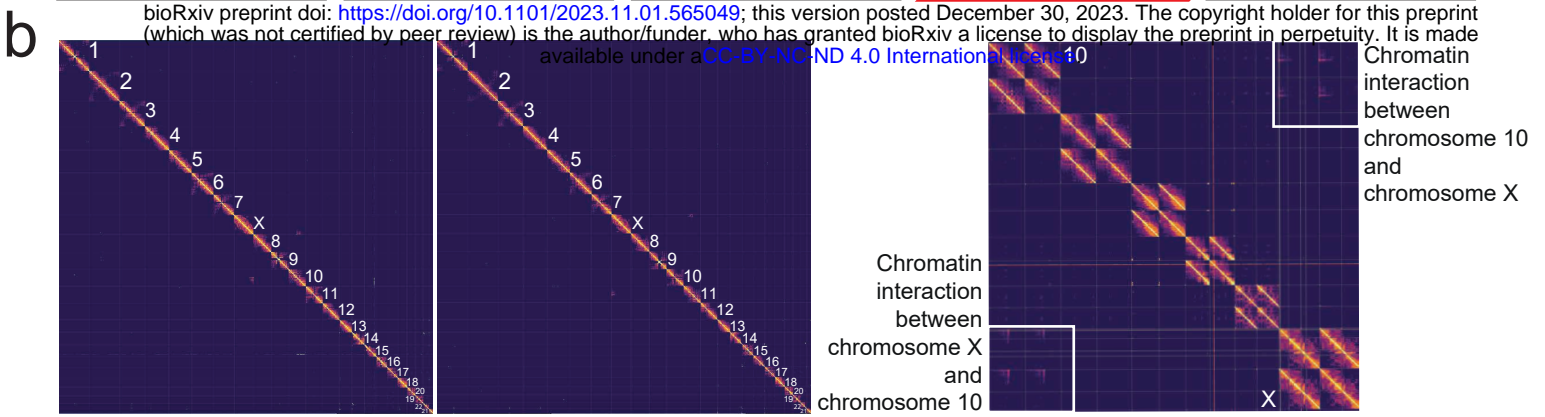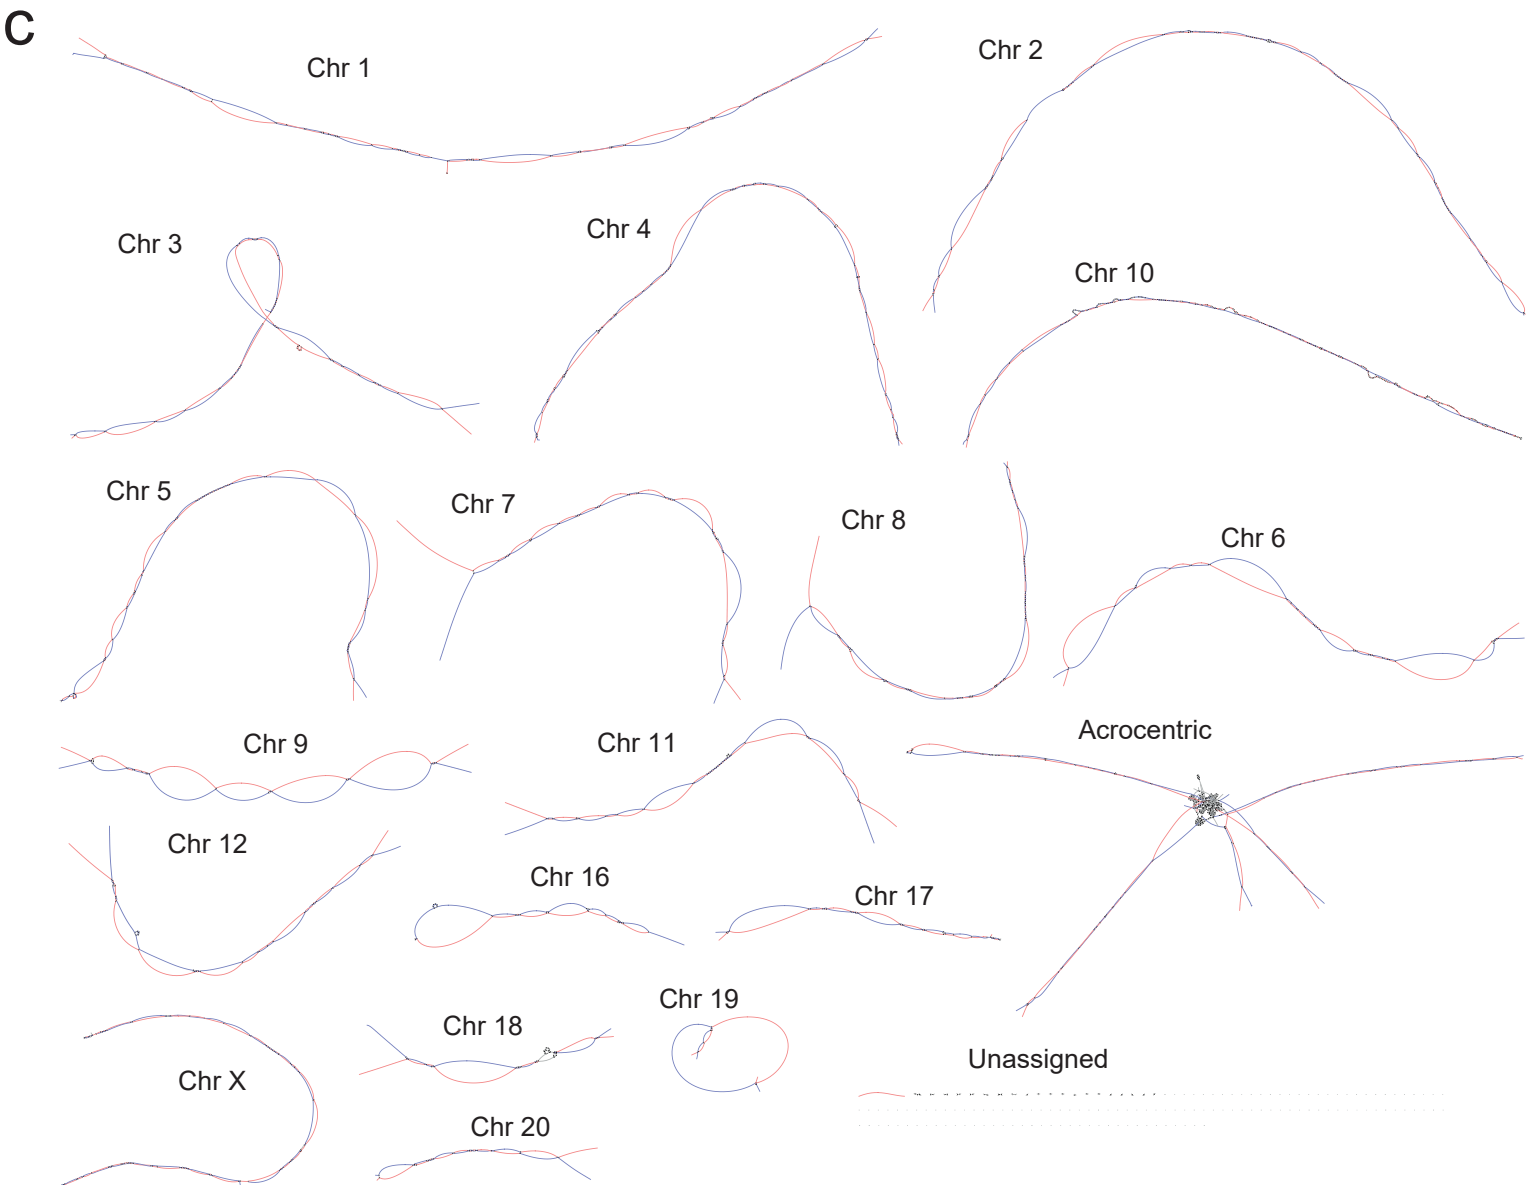



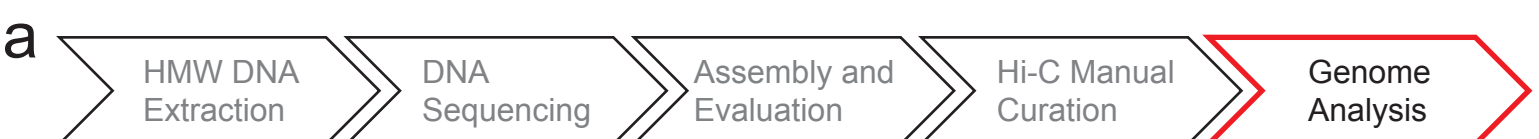

**b** bioRxiv preprint doi: <https://doi.org/10.1101/2023.11.01.565049>; this version posted December 30, 2023. The copyright holder for this preprint (which was not certified by peer review) is the author/funder, who has granted bioRxiv a license to display the preprint in perpetuity. It is made available under a [CC-BY-NC-ND 4.0 International license](https://creativecommons.org/licenses/by-nc-nd/4.0/).

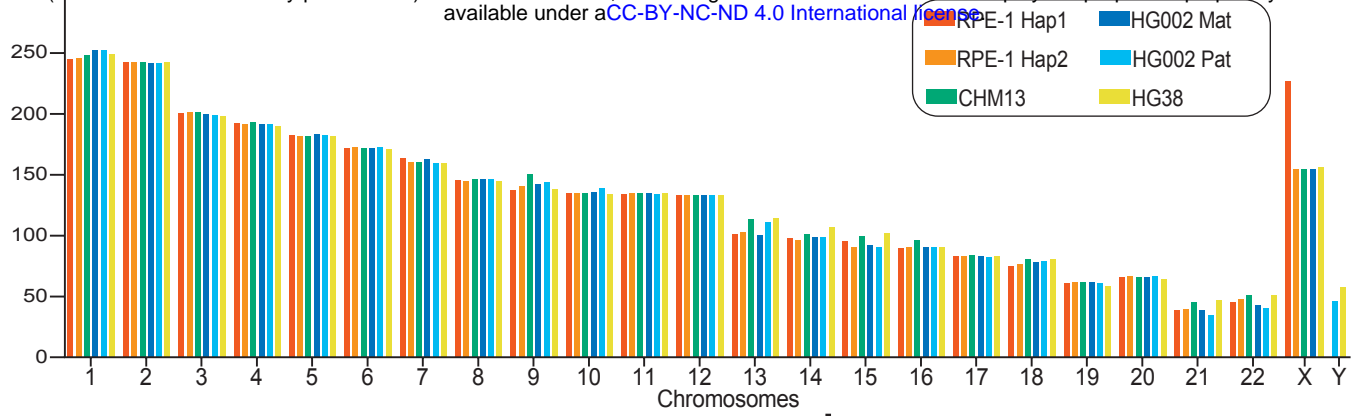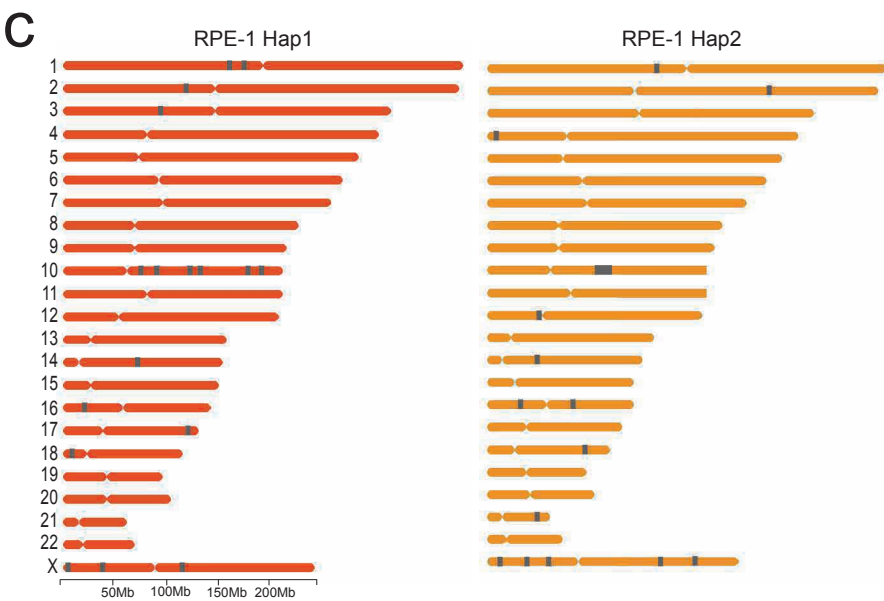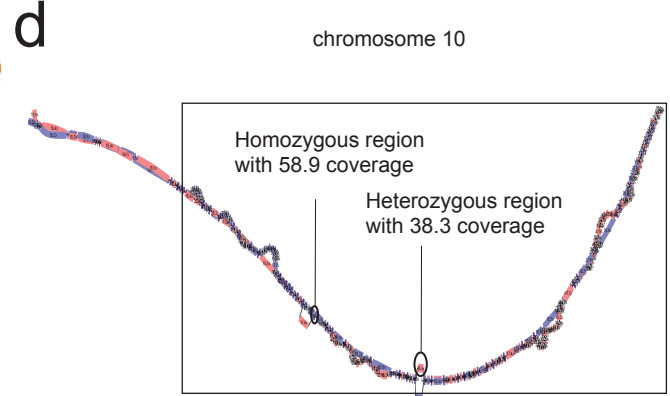

**e** Verkko assembly with HiFi and ONT (over > 70 kbp)

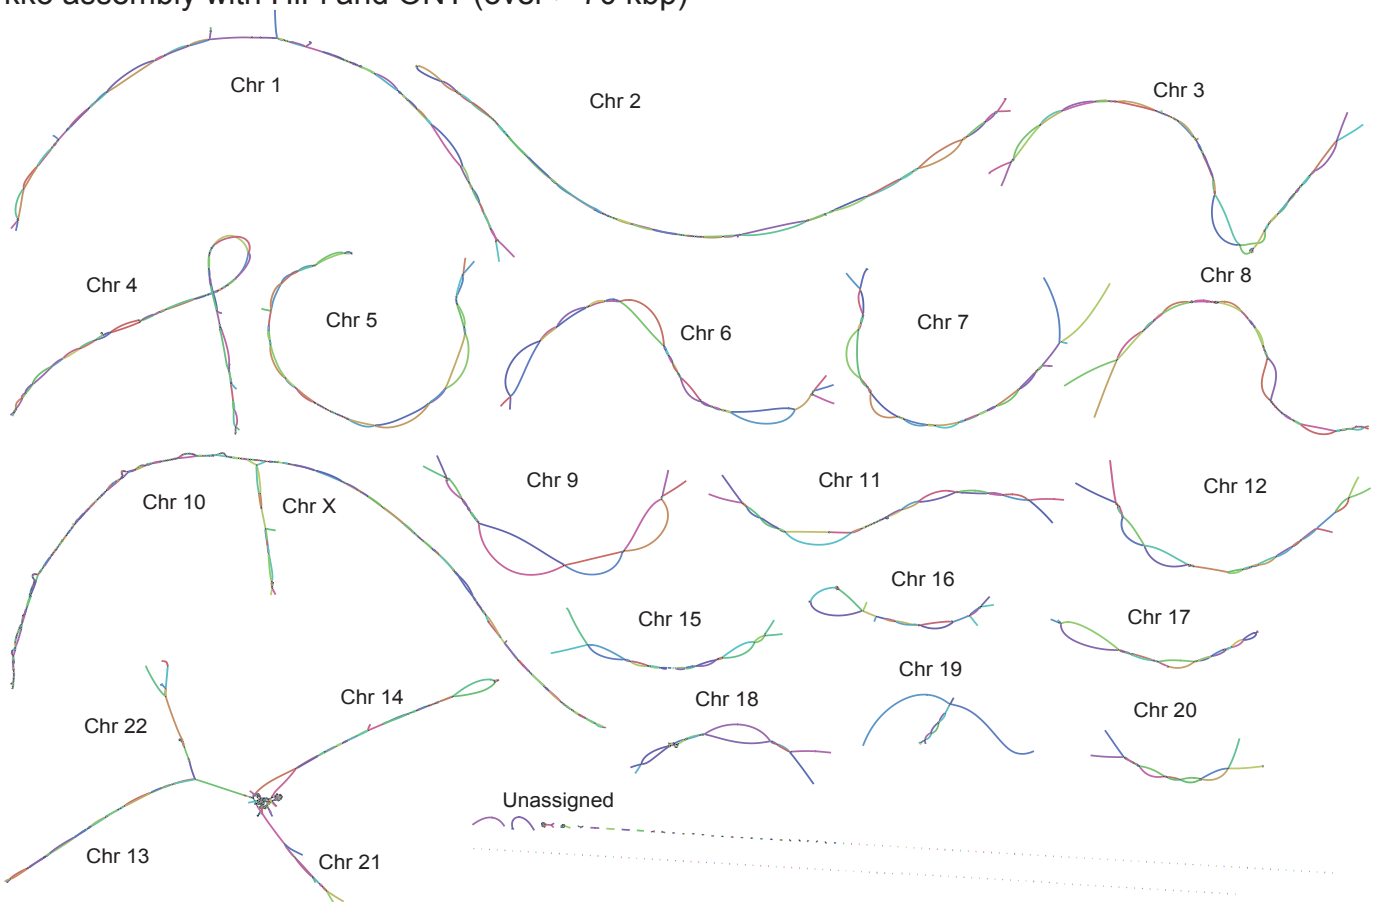

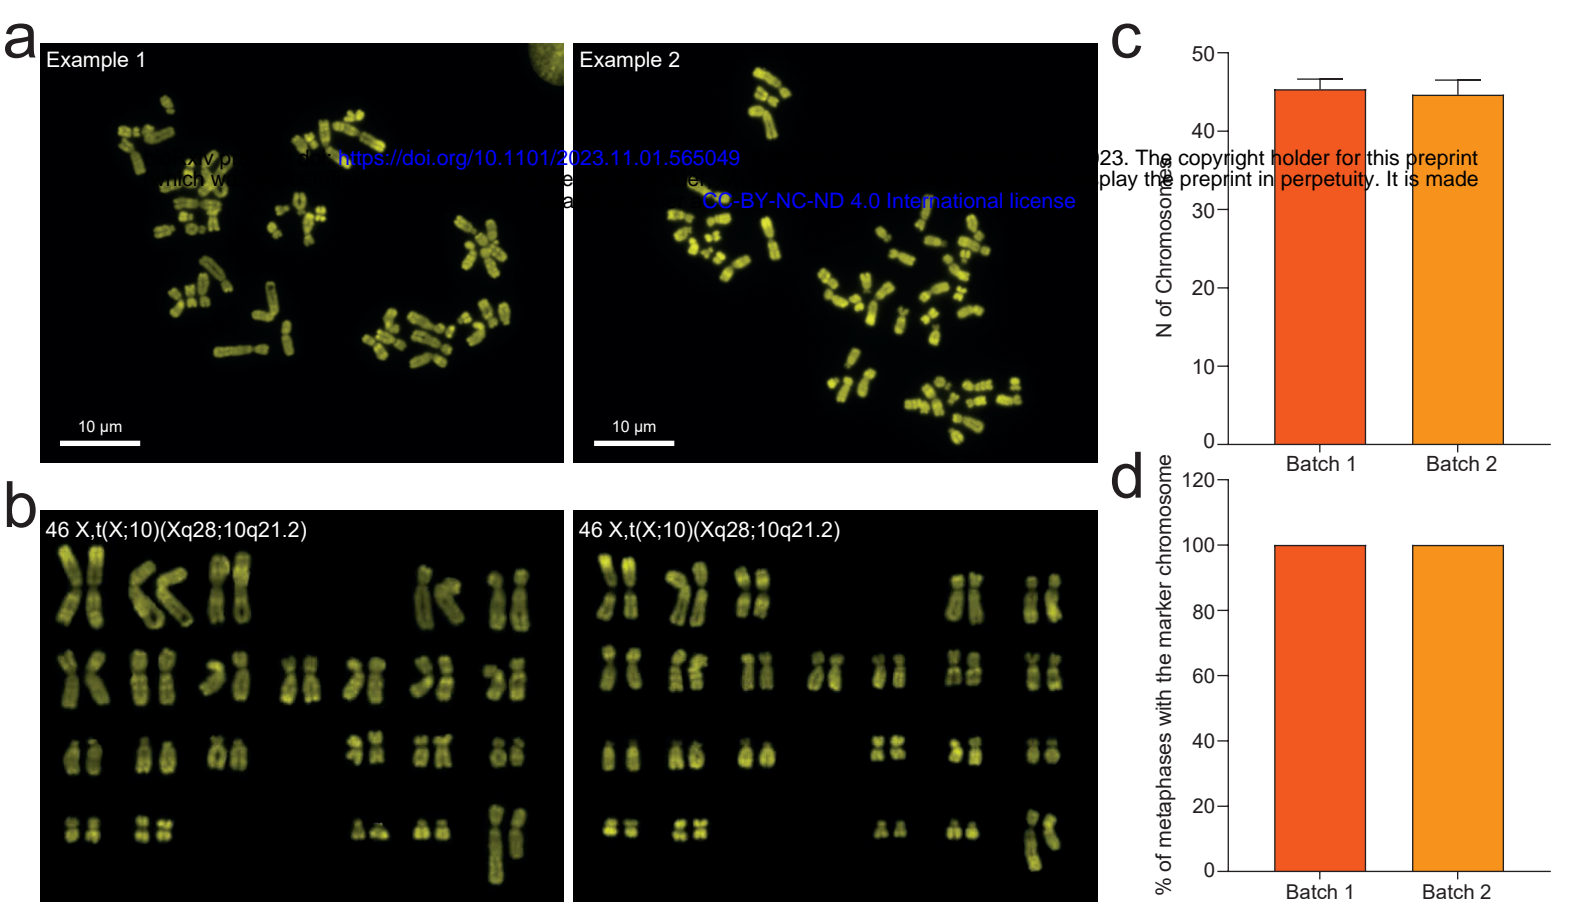

# Translocation localization

 = Mapq 10-60, supplementary alignments chrX hap1  
 = 3603 bp deletion  
 chr10 Hap2  
 chrX Hap1

**a** bioRxiv preprint doi: <https://doi.org/10.1101/2023.11.01.565049>; this version posted December 30, 2023. The copyright holder for this preprint (which was not certified by peer review) is the author/funder, who has granted bioRxiv a license to display the preprint in perpetuity. It is made available under a [CC-BY-NC-ND 4.0 International license](https://creativecommons.org/licenses/by-nc-nd/4.0/).

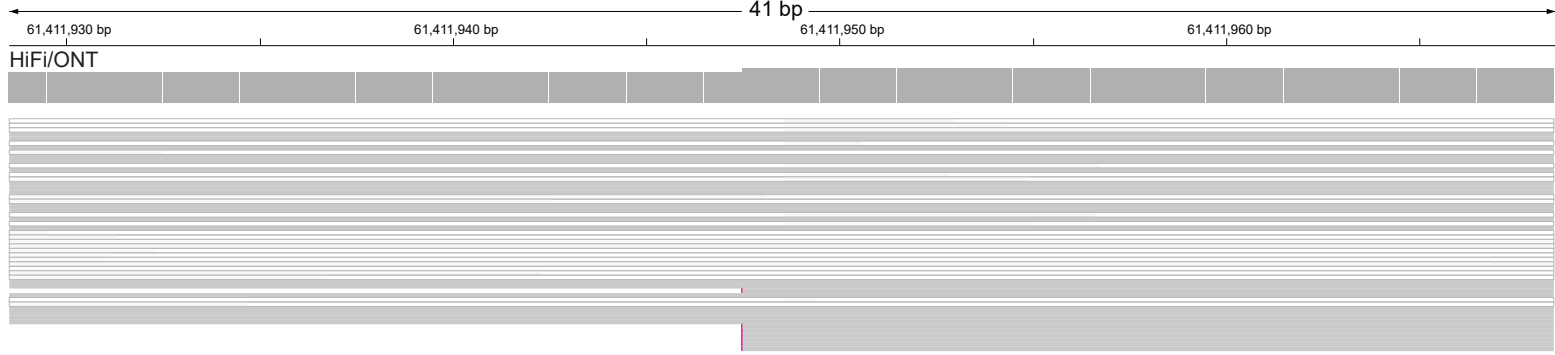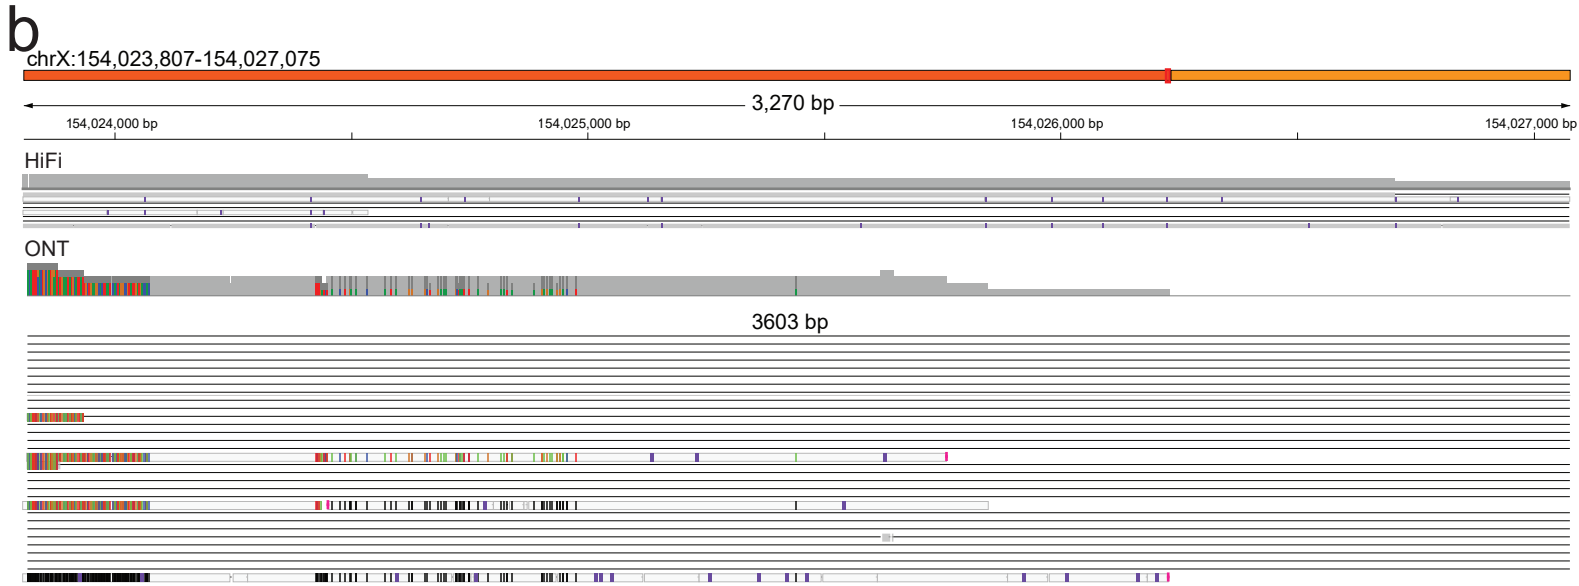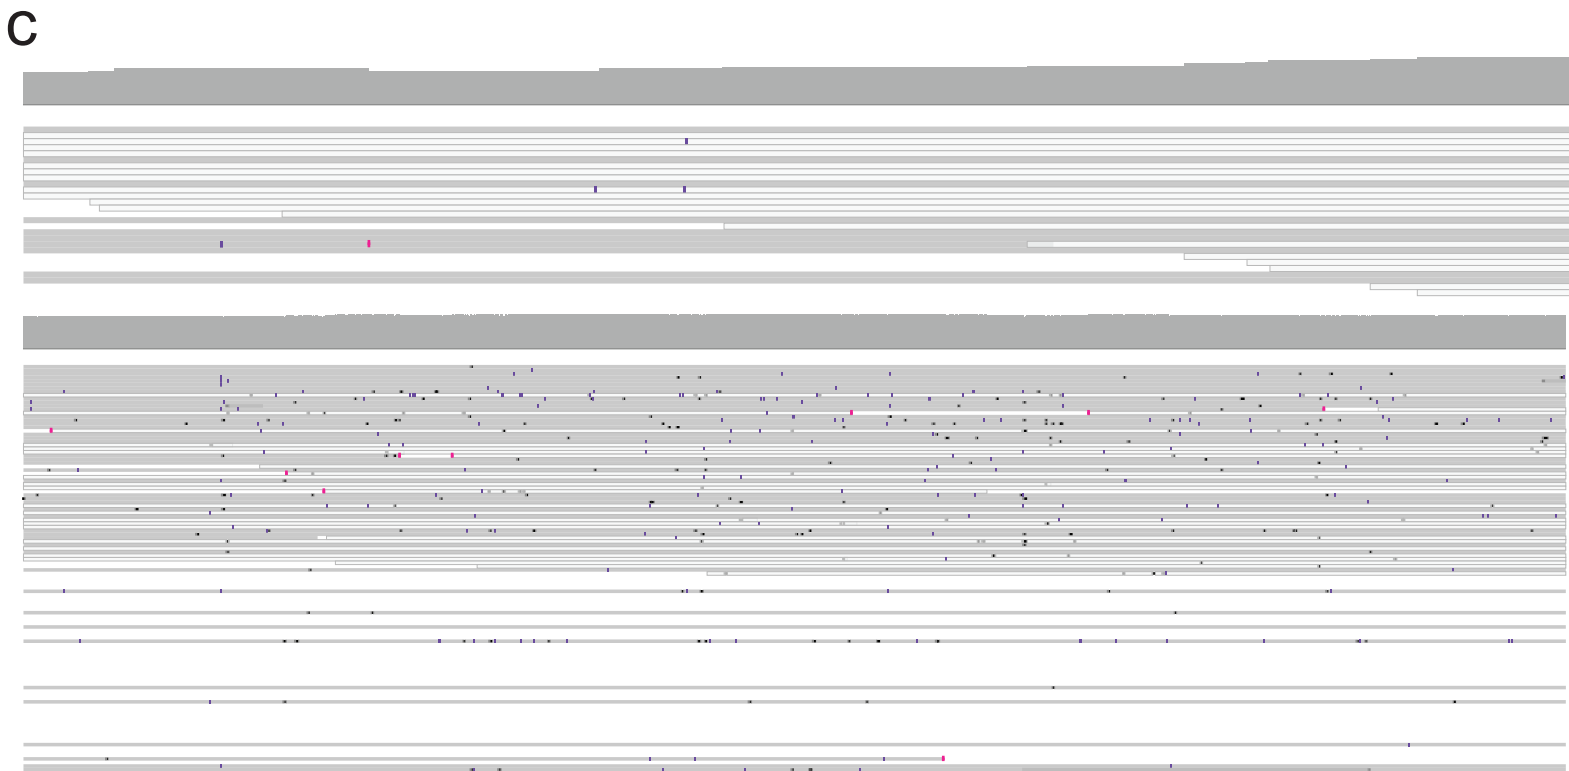

chr 1

chr 3

chr 7

bioRxiv preprint doi: <https://doi.org/10.1101/2023.11.01.565049>; this version posted December 30, 2023. The copyright holder for this preprint (which was not certified by peer review) is the author/funder, who has granted bioRxiv a license to display the preprint in perpetuity. It is made available under a [CC-BY-NC-ND 4.0 International license](#).

Hap1

1

2

Hap2

chr 8

chr9

chr 10

chr 12

chr13

chr 15

chr 17

chr 18

chr 19

chr20

chr 21

chr 22

1=LHOR organization in Super Families (SF0-3)

2=Specific variants for each haplotype

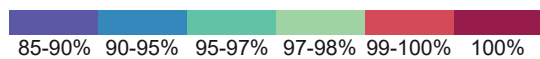

85-90% 90-95% 95-97% 97-98% 99-100% 100%

**a****IHORs Coverage**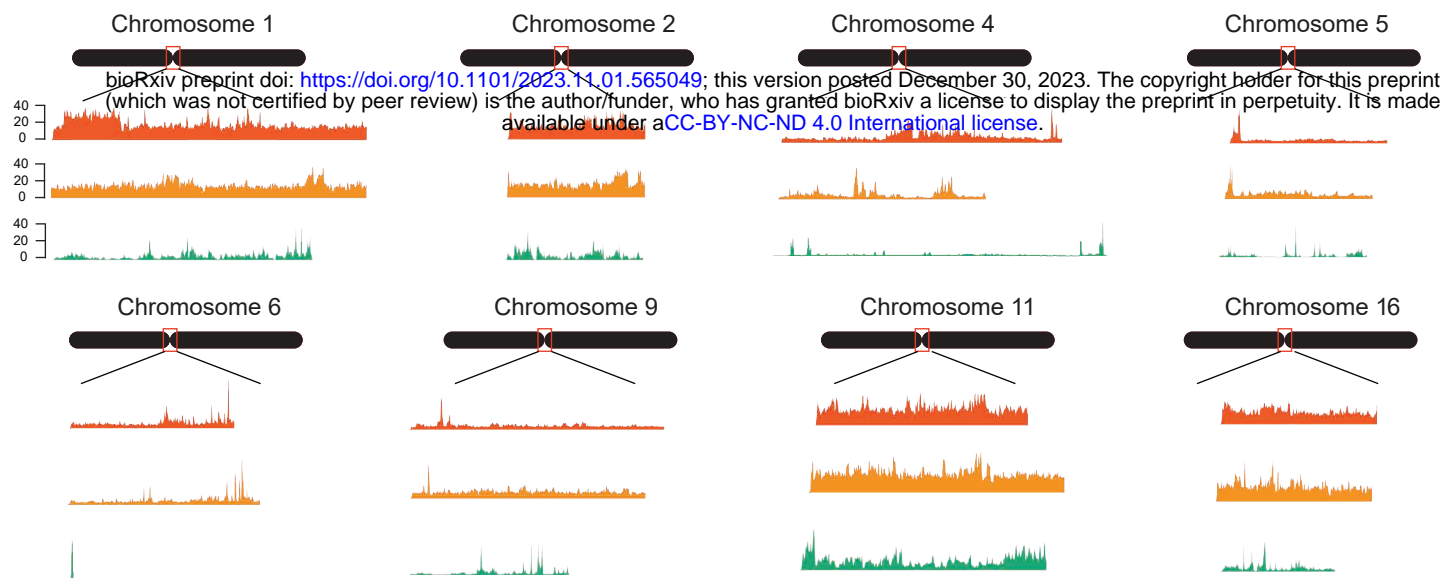**b****Sequence Identity**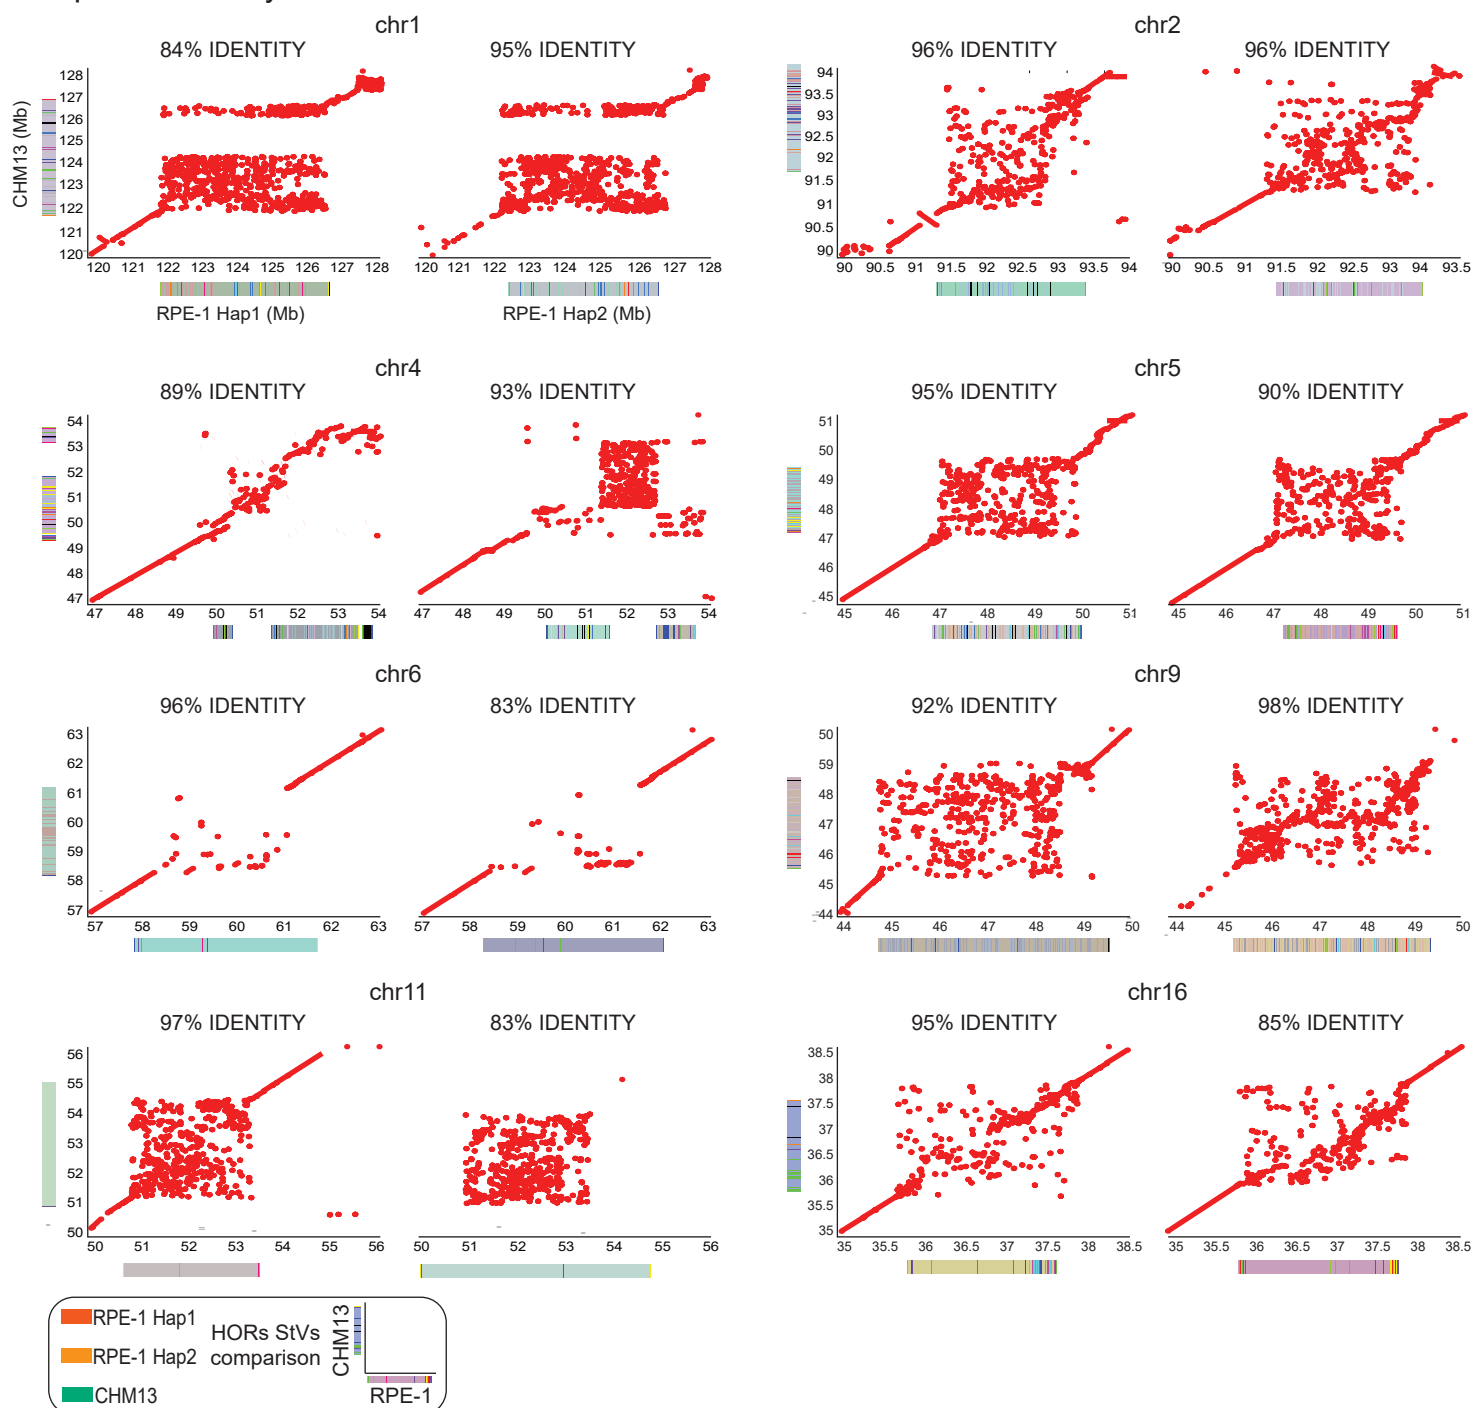

a

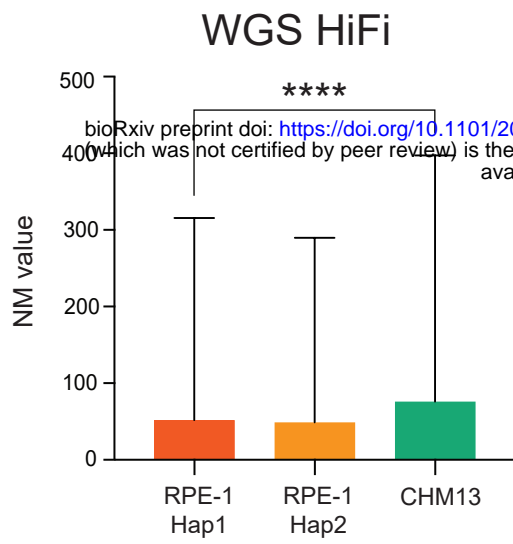

b

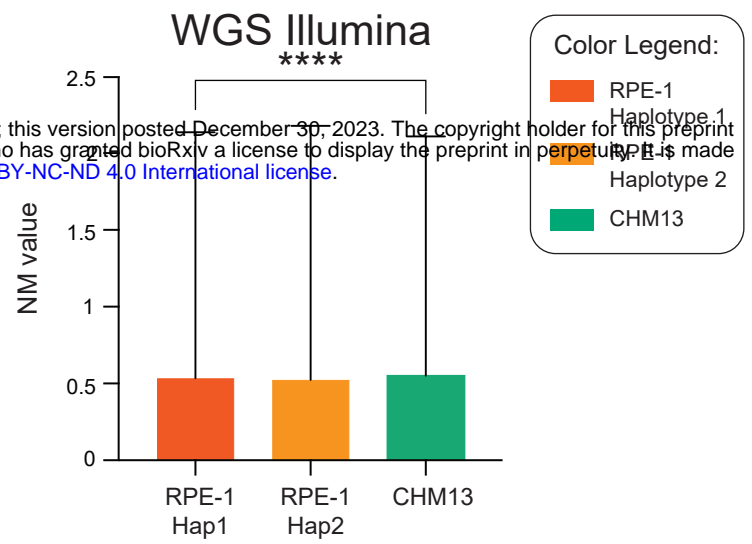

c

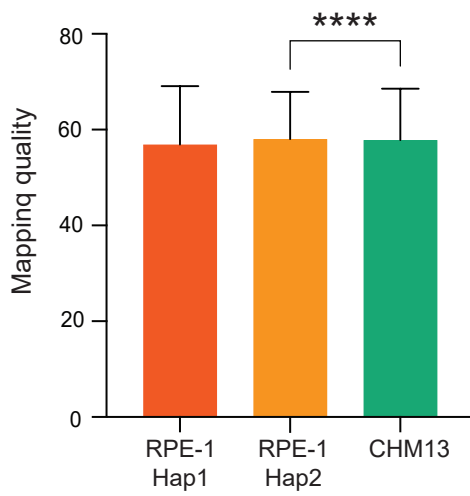

d

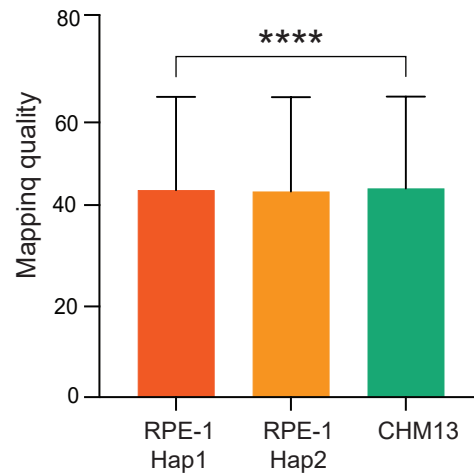

e

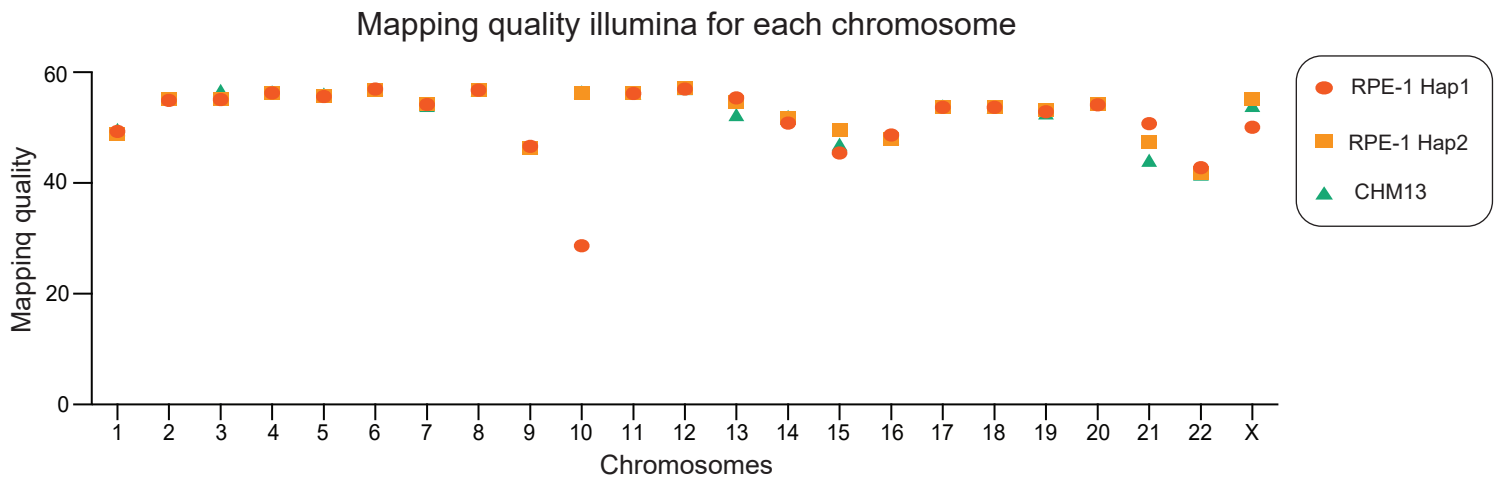



## Haplotype 1

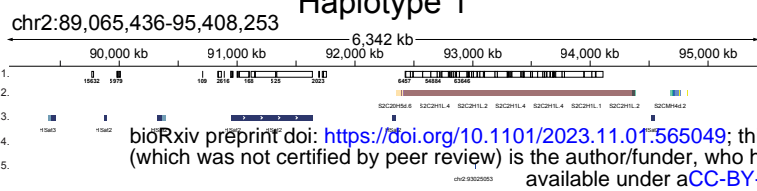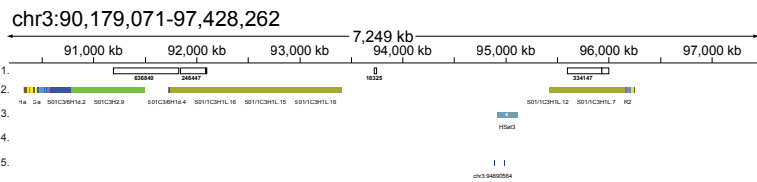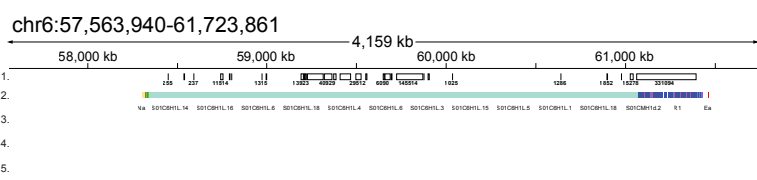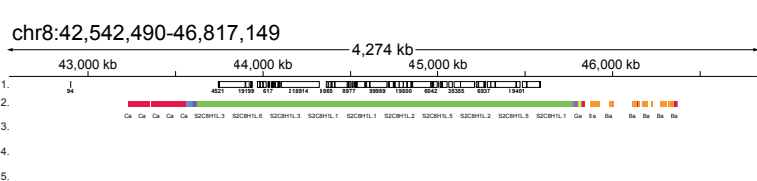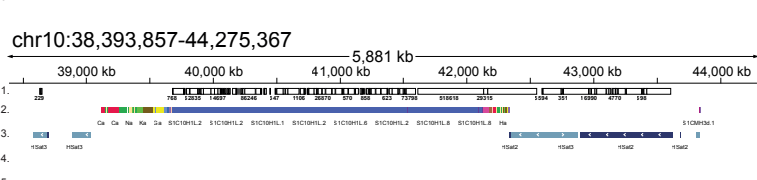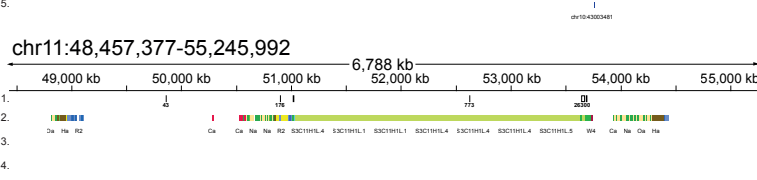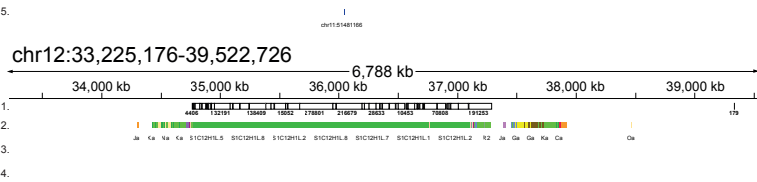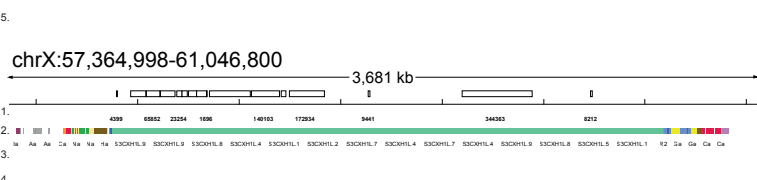

1. Highly Diverged Region annotation
2. Live High Order Repeat annotation
3. Human satellite annotation
4. Assembly regional errors
5. Assembly regional heterozygous loci

## Haplotype 2

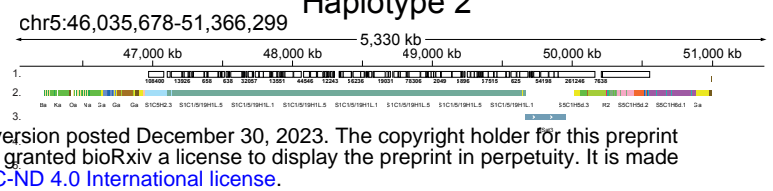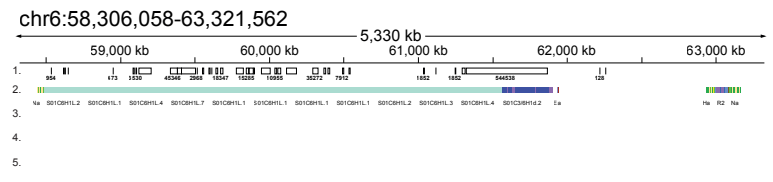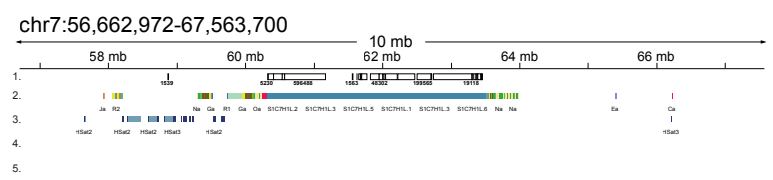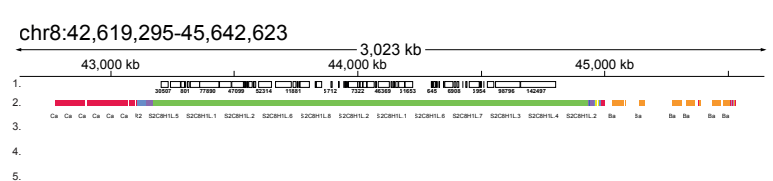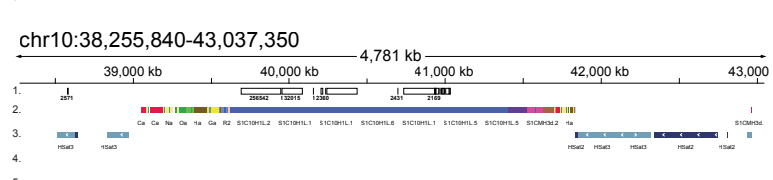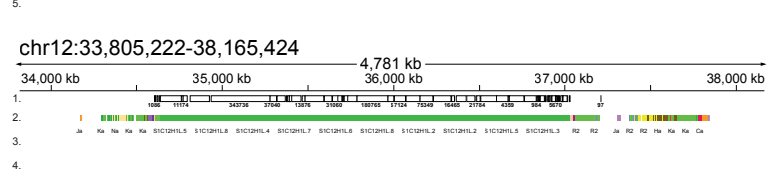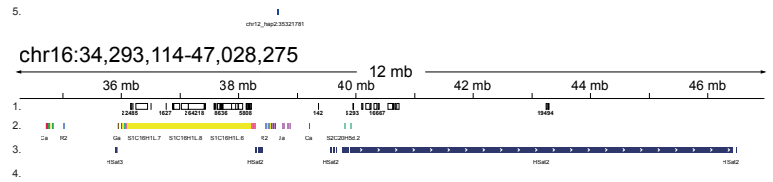

Supplement: NIHPP2023.11.01.565049V2-supplement-1.pdf [file NIHPP2023.11.01.565049V2-supplement-1.pdf]
